*Interactive effects of oxygen, carbon dioxide and flow on photosynthesis and respiration in the Scleractinian coral *Galaxea fascicularis**

Ronald Osinga<sup>1\*</sup>, Marlous Derksen-Hooijberg<sup>1,2</sup>, Tim Wijgerde<sup>1,3</sup> and Johan A.J. Verreth<sup>1</sup>

1. Wageningen University, Aquaculture & Fisheries, PO Box 338, 6700 AH Wageningen, The Netherlands
2. Radboud University Nijmegen, Aquatic Ecology & Environmental Biology, Heyendaalseweg 135, 6525 AJ Nijmegen, The Netherlands
3. Coralpublications, Livingstonelaan 1120, 3526 JS Utrecht, The Netherlands

Key words: coral, oxygen, flow, carbon dioxide, photosynthesis, respiration

\*Corresponding author: Ronald Osinga: [ronald.osinga@wur.nl](mailto:ronald.osinga@wur.nl)

Marlous Derksen-Hooijberg: [m.hooijberg@science.ru.nl](mailto:m.hooijberg@science.ru.nl)

Tim Wijgerde: [wijgerde@coralpublications.com](mailto:wijgerde@coralpublications.com)

Johan A.J. Verreth: [johan.verreth@wur.nl](mailto:johan.verreth@wur.nl)

## Summary statement

A multifactorial experiment revealed no effect of oxygen on coral photosynthesis and an increase in coral photosynthesis under high flow and a doubled concentration of dissolved carbon dioxide.

## Abstract

Rates of dark respiration and net photosynthesis were measured on six replicate clonal fragments of the stony coral *Galaxea fascicularis* (Linnaeus 1767), which were incubated under twelve different combinations of dissolved oxygen (20%, 100% and 150% saturation), dissolved carbon dioxide (9.5 and 19.1  $\mu\text{mol L}^{-1}$ ) and water flow (1-1.6  $\text{cm s}^{-1}$  versus 4-13  $\text{cm s}^{-1}$ ) in a repeated measures design. Dark respiration was enhanced by increased flow and increased oxygen saturation in an interactive way, which relates to improved oxygen influx into the coral tissue. Oxygen saturation did not influence net photosynthesis: neither hypoxia nor hyperoxia affected net photosynthesis, irrespective of flow and pH, which suggests that hyperoxia does not induce high rates of photorespiration in this coral. Flow and pH had a synergistic effect on net photosynthesis: at high flow, a decrease in pH stimulated net photosynthesis by 14%. These results indicate that for this individual of *G. fascicularis*, increased uptake of carbon dioxide rather than increased efflux of oxygen explains the beneficial effect of water flow on photosynthesis. Rates of net photosynthesis measured in this study are among the highest ever recorded for scleractinian corals and confirm a strong scope for growth.

## 1. Introduction

The symbiosis between scleractinian corals and phototrophic dinoflagellates (zooxanthellae) has been studied intensively (reviewed in Furla et al., 2005; Weis, 2008; Osinga et al., 2012). Factors reported to influence the efficiency of photosynthetic processes inside corals include light (reviewed in Osinga et al. 2012), temperature (reviewed in Smith et al., 2005), nutrients (reviewed in Osinga et al., 2011) and gas exchange (e.g. Dennison and Barnes, 1988; Finelli et al., 2006). Gas exchange involves both diffusion of the primary substrate for photosynthesis, carbon dioxide, into the coral and the diffusion of photosynthetically produced oxygen out of the coral tissue.

The role of gas exchange in coral photosynthesis has been studied mainly in relation to water flow around the coral. Water flow influences the rate of diffusion of dissolved gases from the surrounding water into the coral tissue and vice versa (Patterson et al., 1991). Increased water flow reduces the width of a thin, stagnant water layer directly adjacent to the coral surface termed diffusive boundary layer (DBL)(Vogel, 1994). The width of the DBL directly affects the rate of diffusion. In addition, diffusion rates depend on the steepness of the gas concentration gradient as described in Fick's first law of diffusion (Patterson et al., 1991):

$$J = -D \frac{\delta C}{\delta x} \quad (\text{Equation 1}),$$

where J is the diffusive flux ( $\text{mole m}^{-2} \text{s}^{-1}$ ), D is the gas-specific diffusion constant ( $\text{m}^2 \text{s}^{-1}$ ), C is the concentration of the gas ( $\text{mole m}^{-3}$ ) and x is the diffusion distance (m).

Several authors have reported positive effects of water flow on photosynthesis in corals (Dennison and Barnes, 1988; Lesser et al., 1994; Nakamura et al., 2005, Finelli et al., 2006; Mass et al., 2010; Schutter et al., 2011). In a flume experiment with *Galaxea fascicularis*, Schutter et al. (2011) found an instantaneous increase in photosynthesis upon an increase in flow velocity from 5 to 20  $\text{cm s}^{-1}$ , which supports the idea that the effects of flow on photosynthesis are related to an improved exchange of dissolved gases. However, it remains unclear whether this flow-effect relates to a higher influx of carbon dioxide into the coral tissue (Dennison and Barnes, 1988; Lesser et al., 1994) or to a higher efflux of oxygen out of the coral tissue (Nakamura et al., 2005, Finelli et al., 2006; Mass et al., 2010; Schutter et al., 2011). Mass et al. (2010) demonstrated that the onset of flow led to a decrease of oxygen

supersaturation from 500% to 200% inside illuminated tissue of the scleractinian coral *Favia veroni*. This decrease in internal oxygen was accompanied by an increase in the rate of net photosynthesis. Mass et al. (2010) concluded that a flow-induced, enhanced efflux of oxygen out of the coral tissue increases the efficiency of photosynthetic carbon fixation by reducing the rate of photorespiration. Photorespiration is a reaction in which oxygen instead of carbon dioxide binds to Rubisco, the initial carbon dioxide fixing enzyme in the Calvin-Benson-Bassham (CBB) Cycle (Peterhansel et al., 2010). Rubisco then converts oxygen and ribulose biphosphate into 2-phosphoglycerate (2PG), instead of converting carbon dioxide and ribulose biphosphate into 3-phosphoglycerate (3PG). Although 3PG can be regenerated from 2PG, this process requires several reaction steps, which consume more metabolic energy than regenerated 3PG can return after its uptake in the CBB Cycle (Peterhansel et al., 2010). Hence, photorespiration decreases the efficiency of the photosynthesis process. So far, only Rubisco type II, which is the type of Rubisco that is most sensitive to photorespiration, has been found in zooxanthellae (Rowan et al., 1996), which supports the view that flow modulates photosynthesis mainly through a reduction in photorespiration. Notwithstanding this, Smith et al. (2005) stated that photorespiration in corals is not likely to play a major role due to the presence of an efficient carbon concentrating mechanism (CCM) in *Symbiodinium* (Leggat et al., 1999).

The contradicting views on the effects of dissolved oxygen on photosynthesis and photorespiration in corals and, consequently, on the mechanism that underlies flow-enhanced photosynthesis prompted us to address the following research questions: 1) How does the ambient oxygen concentration in seawater affect photosynthesis in corals? 2) Does water flow stimulate photosynthesis in corals through stimulating the uptake of carbon dioxide or through reducing negative effects of oxygen? To answer these questions, we studied the effect of flow on net photosynthesis and dark respiration in the stony coral *Galaxea fascicularis* (Linnaeus 1767) under three different levels of dissolved oxygen (hypoxia-20% saturation, normoxia-100% saturation and hyperoxia-150% saturation) and two different values for dissolved carbon dioxide (9.5 and 19.1  $\mu\text{mol L}^{-1}$ ), as reflected by two corresponding values for pH (8.1 and 7.84). The applied values for pH and oxygen saturation are within the range experienced by corals in nature: natural diel fluctuations in pH (8.7-7.8) and oxygen saturation (27-247%) have been reported for reef flats and tropical lagoons (Ohde and Van Woesik, 1999). Our results suggest that in *G. fascicularis*, flow stimulates

photosynthesis through a more efficient uptake of carbon dioxide rather than through a decrease in photorespiration, whereas respiration is stimulated by flow through an increased uptake of oxygen.

## Materials and Methods

### Corals

Captive bred specimen of the encrusting coral *G. fascicularis* (originally obtained under CITES no. 52139) were provided by Burgers' Zoo BV (Arnhem, The Netherlands). All experiments were conducted at Wageningen University (Wageningen, The Netherlands). No approval from an ethics committee was required as scleractinian corals are exempted from legislation concerning the use of animals for scientific purposes in the European Union (Directive 2010/63/EU). Six genetically identical fragments of *G. fascicularis* were obtained from one parent colony. The fragments were glued to PVC plates of 25 cm<sup>2</sup>, and were allowed to recover from fragmentation for a period of three weeks before the start of the experiments. The coral fragments were held in an aquarium of 356 dm<sup>3</sup>, wherein flow velocity, temperature and salinity were maintained at constant values (flow velocity: 10-20 cm s<sup>-1</sup>, temperature 25 °C, salinity 35.0 g dm<sup>-3</sup>). Corals were subjected to a 12/12 hour light/dark cycle at a quantum irradiance (E) of 280 μmole quanta m<sup>2</sup> s<sup>-1</sup>. Alkalinity and calcium concentrations were measured five times a week and were adjusted when necessary by adding NaHCO<sub>3</sub> and CaCl<sub>2</sub> × 2H<sub>2</sub>O, respectively. Total alkalinity was maintained at the current natural oceanic value of 2.4 mEq dm<sup>-3</sup> and calcium at 400 mg dm<sup>-3</sup>. Corals were fed 30 cm<sup>3</sup> of a concentrated suspension of freshly hatched *Artemia nauplii* (~3000 nauplii cm<sup>-3</sup>) on a daily basis. Artificial seawater was made with enriched blend, phosphate and nitrate-free Reef Crystals (Aquarium Systems, Sarrebourg, France) and was aerated a few days before use. Prior to the incubations, the projected surface area of the coral fragments was determined according to Wijgerde et al. (2012a) from top-view pictures of the fragments using the software Image Tool for Windows.

### Experimental design, water chemistry and metabolic measurements

Interactive effects of flow, carbon dioxide (CO<sub>2</sub>) and oxygen (O<sub>2</sub>) on net photosynthesis (P<sub>n</sub>) and dark respiration (R<sub>d</sub>) were studied by subjecting corals to different combinations of

these parameters in a 2 by 2 by 3 factorial design for repeated measures. Rates of  $P_n$  and  $R_d$  were determined in 1500 cm<sup>3</sup> perspex cylindrical incubation chambers using an oxygen evolution technique as described in (Schutter et al., 2008). Temperature in the chambers was maintained at 26 °C by leading freshwater of 26.5 to 27 °C through a water jacket surrounding the cylindrical chamber. The freshwater was kept at 26.5 to 27 °C by a TC20 Aquarium Cooler (Teco, Ravenna, Italy).

Flow was created in the incubation chambers by a magnetic stirrer, hereby using two different sized stirring bars to obtain two distinct flow regimes: high flow velocity and low flow velocity. The actual range of velocities within each flow regime was determined by video recordings of neutrally buoyant particles that were moving over the experimental coral fragments perpendicular to the camera. The flow velocity of at least five particles per flow regime was determined by dividing the travelled distance of the particle by the time needed to travel that distance. For the low flow regime, flow velocity within a chamber varied between 1 to 1.6 cm s<sup>-1</sup>, whereas for the high flow regime, flow velocity within a chamber varied between 4 to 13 cm s<sup>-1</sup>.

Two values for dissolved CO<sub>2</sub> concentration were applied, 9.5 and 19.1 μmol L<sup>-1</sup>. The value of 9.50 μmol L<sup>-1</sup> is representative for current atmospheric and oceanic conditions. The value of 19.1 μmol L<sup>-1</sup> represents a doubling of the current atmospheric concentration. Three oxygen saturation levels were applied, 20%, 100% and 150%, which were obtained by flushing seawater with either nitrogen gas (N<sub>2</sub>) or pure oxygen (O<sub>2</sub>) gas.

Following (Riebesell et al. 2010), it was calculated that at prefixed, oceanic values for total alkalinity (2.4 mEq L<sup>-1</sup>), salinity (35 ‰) and temperature (26 °C; representative for coral reefs), the desired levels of dissolved CO<sub>2</sub> of 9.5 and 19.1 μmol L<sup>-1</sup> correspond to pH values of 8.10 and 7.84, respectively. We applied these pH values to experimentally control the concentration of dissolved CO<sub>2</sub> by measurement of pH. Hence, the two values for pH (8.10 and 7.84) will be used in the subsequent text to indicate the two experimental CO<sub>2</sub> treatments.

Before the start of each incubation, water from the aquarium in which the corals were maintained was specifically prepared for that particular treatment in a 10 L bucket. First, the seawater was titrated with a 1M solution of HCl to acquire a pH of 8.10. Subsequently, total alkalinity ( $A_t$ ) was measured and NaHCO<sub>3</sub> was added to restore the alkalinity to the current oceanic value of 2.4 mEq L<sup>-1</sup>. The water was then further prepared by addition of CO<sub>2</sub>, O<sub>2</sub>

and/or N<sub>2</sub> to achieve the particular combinations of dissolved gases needed for each treatment, and afterwards the prepared water was carefully poured in the incubation cells. During the preparation of the water, the O<sub>2</sub> saturation was monitored by measuring the dissolved O<sub>2</sub> concentration with an optical oxygen probe (Hach, LDO101, HQ 40d multi; calibrated prior to use in water-saturated air) and the CO<sub>2</sub> concentration was measured indirectly by measuring pH in the water sample. All measurements of seawater pH were done with a pH probe (Hach) that was calibrated using two NBS pH calibration fluids (WTW, Weilheim, Germany) representing a pH of 7.0 and a pH of 10.0, which were supplemented with 25.4 g dm<sup>-3</sup> NaCl (or 10 g dm<sup>-3</sup> Na<sup>+</sup>), to approximate the ionic strength of seawater at a salinity of 35 g L<sup>-1</sup> (corresponding to 10 g dm<sup>-3</sup> Na<sup>+</sup>, cf. Wijgerde et al., 2014).

Corals were placed in the incubation chambers immediately after filling the chambers with the customised seawater, after which the chambers were sealed airtight by tightening the lid. Two corals were measured at the same time, in parallel with one control (incubation cell only containing seawater) to correct for background photosynthesis/respiration or possible chemical water composition changes caused by the addition of the gases. Control values were subtracted from incubations with corals.

To avoid light limitation effects, P<sub>n</sub> was measured at an E of 500 μmole quanta m<sup>-2</sup> s<sup>-1</sup>, which is considered to be saturating for this clone of *G. fascicularis* (Schutter et al., 2008).

Aquablue Spezial T5 fluorescent bulbs (ATI, Hamm, Germany) were used to assure a good light spectrum. E was measured with a Li-1400 light meter (Li-Cor, Lincoln, USA). P<sub>n</sub> and R<sub>d</sub> were assessed by measuring the change in dissolved O<sub>2</sub> concentration in the incubation cells by optical oxygen probes (Hach) that had been calibrated prior to use in water-saturated air. O<sub>2</sub> concentration was measured every minute for a period of 80 minutes. After an acclimation period of 10 minutes, a subsequent period of 30 minutes was applied to determine P<sub>n</sub>. Then, lights were turned off and the incubation cells were darkened to measure R<sub>d</sub>. R<sub>d</sub> was assessed by measuring the dissolved oxygen concentration for 30 minutes after a second acclimation period of 10 minutes. Throughout the incubations, oxygen saturation levels never deviated more than 5% from the initial values. These small deviations did not notably affect P<sub>n</sub> or R<sub>d</sub>, as regression coefficients for the observed increases or decreases in oxygen over time were always above 0.99.

In total, 72 measurements were performed using six replicate corals, which were subjected to each of the 12 treatments. The sequence of the experiments was randomised using

Microsoft Excel. By using such a repeated measures design, variability due to differences in size and shape of the experimental colonies could be minimized.

An additional experiment was performed in which a more extreme O<sub>2</sub> saturation was chosen to further elucidate the effects of O<sub>2</sub> on P<sub>n</sub>. The same six experimental colonies of *G. fascicularis* were subjected to both 100% O<sub>2</sub> saturation and 280% O<sub>2</sub> supersaturation, which resembles the daily maximum of 247% reported by Ohde & Van Woesik (1999) for Indo-Pacific reef flats. Other experimental conditions were identical to the previously described experiment.

### **Data analysis**

Data were analysed in SPSS Statistics version 19 (IBM, Armonk, USA). Data were checked for normality (Shapiro-Wilk's test) and sphericity (Mauchly's test; only applied to data regarding different oxygen saturation levels) to test whether the assumptions for ANOVA were met. All data for dark respiration and net photosynthesis were normally distributed based on the skewness and kurtosis of residual histograms. The assumption of sphericity was met for oxygen saturation ( $p > 0.050$ ). A three-way factorial ANOVA for repeated measures was applied to analyse both data series. Significant interactive effects were followed up by simple contrasts, to determine the effect of a given factor at various level combinations of the remaining two factors. The supersaturation control experiment was analysed by a paired t-test. A  $p < 0.050$  was considered statistically significant.

### **Results**

Average rates of dark respiration and net photosynthesis under the 12 experimental treatments are presented in Fig 1. Table 1 shows the corresponding results of the three-way ANOVA. Data for dark respiration are graphically presented as negative oxygen production (i.e. oxygen consumption). Throughout the text, the absolute values will be used to express rates of dark respiration.

Values for dark respiration ranged between 0.050 and 0.087 (mg O<sub>2</sub> cm<sup>-2</sup> h<sup>-1</sup>). There was a significant main effect of flow velocity on dark respiration (Table 1). No significant main effect of pH on dark respiration was observed. Oxygen saturation, on the other hand, did have a significant main effect on dark respiratory rates (Table 1). A significant interaction



was found between the effects of oxygen and flow velocity on dark respiration in *G. fascicularis* (Table 1). Under hypoxic (20% O<sub>2</sub>) conditions, flow velocity had a strong and significant effect on dark respiration (42% increase,  $p = 0.008$  at low pH and 43% increase,  $p = 0.014$  at high pH). Under normoxic conditions (100% O<sub>2</sub>), flow also significantly enhanced dark respiration (16% increase,  $p = 0.004$  at low pH and 30% increase,  $p = 0.035$  at high pH). The flow effect was not significant under hyperoxic (150% O<sub>2</sub>,  $p = 0.388$  and  $p = 0.874$ , respectively) conditions. No three-way interaction was found (Table 1).

Values for net photosynthesis in *G. fascicularis* (Fig. 1) ranged between 0.178 and 0.256 (mg O<sub>2</sub> cm<sup>-2</sup> h<sup>-1</sup>), the rates of net photosynthesis being two to five times higher than the rates of dark respiration. Flow and pH exerted a significant main and interactive effect on net photosynthesis (Table 1). At high flow, there was a significant effect of pH on net photosynthesis (14% increase at pH = 7.84;  $p = 0.026$ ), whereas the pH effect was not significant at the low flow velocity ( $p = 0.113$ ). Vice versa, the effect of flow was significant ( $p = 0.001$ ) at a pH of 7.84, but not at a pH of 8.10 ( $p = 0.066$ ). The interaction is graphically depicted in Fig. 2. In contrast, no main effect of oxygen saturation on net photosynthesis was found and no interactive effect of oxygen with the other factors (flow, pH) could be observed (Table 1). Furthermore, in the supersaturation control experiment, the additional oxygen (280% supersaturation) did not significantly affect the rate of net photosynthesis (paired t-test,  $p > 0.05$ ), the rates being 0.171 mg O<sub>2</sub> cm<sup>-2</sup> h<sup>-1</sup> (s.d. = 0.019) and 0.174 mg O<sub>2</sub> cm<sup>-2</sup> h<sup>-1</sup> (s.d. = 0.026) for 100% and 280% saturation, respectively.

## Discussion

**Effect of oxygen on photosynthesis** - Our data show that photosynthesis in this particular genotype of *Galaxea fascicularis* is not affected by ambient oxygen levels. Changes in oxygen saturation (both hypoxia and hyperoxia, up to 280% supersaturation) did not influence the net photosynthetic output of *G. fascicularis* under saturating light. As we will outline below, this result implies that photorespiration is not of quantitative importance in this genotype of *G. fascicularis*. A conceptual picture (Fig. 3) illustrates how we deduced this conclusion from our results.

Oxygen produced inside the coral tissue through photosynthesis (gross oxygen production) has three potential sinks: 1) release into the external environment via diffusion (oxygen

evolution, also termed net photosynthesis); 2) respiration, a process referred to as light respiration under illuminated conditions and dark respiration in darkness; 3) photorespiration. Our results show that net photosynthesis in *G. fascicularis* is not affected by ambient oxygen. Hence, an increase in light respiration and photorespiration under high ambient oxygen, as found in *Favia veroni* (Mass et al., 2010), would only be possible if gross photosynthesis would increase as well (Fig. 4, Scenario 1). An increase in gross photosynthesis under high oxygen is not likely, since photosynthetic oxygen production is not limited by oxygen. In contrast, very high oxygen levels (> 800% supersaturation) may even decrease the photochemical yield of the zooxanthellae (Finelli et al., 2006), thus leading to a lower gross productivity. Therefore, it seems reasonable to assume that gross photosynthesis was not affected by ambient oxygen, which excludes Scenario 1 in Fig. 3. With both gross and net photosynthesis remaining unchanged, it is not very likely that light respiration and photorespiration changed under the influence of ambient oxygen. Both processes would in that case have to show an opposite response (Scenarios 2 and 3 in Fig. 3). We conclude from this analysis that photorespiration is not quantitatively important in *G. fascicularis* (Scenario 4 in Fig. 3), as otherwise, we should have observed a decrease in net photosynthesis at high ambient oxygen.

This conclusion is in agreement with work by Muscatine (1980), who found no effect of oxygen on photosynthesis by zooxanthellae *in hospite*. Zooxanthellae *in hospite* may not be very susceptible to photorespiration due to efficient Carbon Concentrating Mechanisms (CCM) that operate within the coral-zooxanthellae symbiosis (Smith et al. 2005).

Notwithstanding this, *ex hospite* photosynthesis of zooxanthellae isolated from *Pocillopora damicornis* was very sensitive to oxygen (Downton et al., 1976), which suggests that the CCM may be largely host-related. Indeed, recent work by Tansik et al. (2015) showed that in several coral species, the DIC influx into the coral tissue is host controlled. These corals exhibit external carbonic anhydrase activity (i.e. bound to the outer cell membrane of the coral ectoderm cells) that mediates the influx of carbon dioxide into the coral tissue. The *Galaxea fascicularis* – *Symbiodinium* symbiosis has both a carbonic anhydrase driven CCM and transport pathways for  $\text{HCO}_3^-$  (Al-Moghrabi et al., 1996; Goiran et al., 1996), thus enabling an efficient supply of DIC to the site of photosynthesis.

The contrast between our results and the study by Mass et al. (2010) shows that effects of oxygen on coral photosynthesis are species-specific. Sensitivity to high oxygen levels may

depend on the effectiveness of the CCM in the coral. Contrasting to *Favia veroni* (Mass et al. 2010), *G. fascicularis* apparently has a highly efficient CCM, making photosynthesis in this species rather insensitive to changes in ambient oxygen.

Interestingly, oxygen supersaturation does affect calcification in this genotype of *G. fascicularis*. A 20 to 33% decline in light calcification rates was found when colonies of this genotype were exposed to oxygen saturation levels of 150% and higher (Wijgerde et al., 2012a). The authors attributed this decline to the formation of reactive oxygen species (superoxides) under high oxygen levels. The differential response of photosynthesis (this study) and calcification (Wijgerde et al. 2012a) to high oxygen may relate to the spatial separation of the two processes. Calcification occurs in the ectodermal layer, whereas photosynthesis takes place within zooxanthellae located in the endodermal layers of the coral (Jokiel, 2011). Endodermal layers have been shown to exhibit higher superoxide dismutase (SOD) activity (Richier et al., 2003). SOD can counteract toxic effects of superoxides. The difference in sensitivity to oxygen between calcification and photosynthesis might thus be explained by a difference in defence possibilities against superoxide toxicity between ectodermal and endodermal cells.

**Effects of carbon dioxide and flow on photosynthesis** - In contrast to dissolved oxygen, the supply of additional CO<sub>2</sub> into the seawater did stimulate net photosynthesis in *G. fascicularis*, an effect that was significant only under the high flow regime of 4-13 cm s<sup>-1</sup>. This finding suggests that the often reported positive effect of flow on coral photosynthesis is, in the case of *G. fascicularis*, due to a flow-induced increase in the uptake of CO<sub>2</sub> rather than due to an increased efflux of oxygen out of the coral tissue.

Increased influx of dissolved inorganic carbon (DIC) under high flow has earlier been suggested to stimulate photosynthesis in symbiotic coral species *Acropora formosa* (Dennison and Barnes, 1988). These authors based their suggestion upon an observed increase in photosynthesis under stirred conditions versus non-stirred conditions. Since no effect of stirring was observed at the compensation point (i.e. no net gas exchange), the observed effect was ascribed to diffusion limitation. Dennison and Barnes (1988) concluded that diffusion limitation of CO<sub>2</sub> rather than inhibition by accumulation of oxygen was responsible for causing the flow-effect on photosynthesis. Their conclusion was based on a preceding study (Crossland and Barnes, 1977) on a related coral species, in which no

photosynthetic response to varying oxygen levels had been found. Our results provide direct evidence for this limiting role of CO<sub>2</sub> diffusion, since we studied the effects of CO<sub>2</sub> and oxygen simultaneously on the same species.

Nevertheless, our results contradict with other literature. According to Tansik et al. (2015), coral photosynthesis is not likely to be DIC limited due to the highly efficient external carbonic anhydrase system. This assumption is in line with several other studies (e.g. Reynaud et al., 2003; Schneider and Erez, 2006; Marubini et al., 2008) in which no beneficial effects of *p*CO<sub>2</sub> on coral photosynthesis were found.

The apparent contrast with our observations likely relate to the specific combination of abiotic parameters that was applied. In our study, light availability was more than twofold higher than in the study by Tansik et al. (2015), at a level that was saturating for photosynthesis (cf. Schutter et al. 2008), which may thus have invoked DIC limitation. The other studies (Reynaud et al., 2003; Schneider and Erez, 2006; Marubini et al., 2008) used higher irradiance levels than Tansik et al. (2015), but those studies, however, do not provide details on the flow conditions that were applied in the experiments. Since flow can augment the *p*CO<sub>2</sub> effect as observed in this study, incubations performed under low flow conditions may not show detectable effects of *p*CO<sub>2</sub> on photosynthesis. Besides, the studies by Marubini et al. (2008) and Reynaud et al. (2003) lasted for periods of one and five weeks, respectively, whereas the current experiment investigated the acute effects (30 minutes exposure) of CO<sub>2</sub>. Possibly, there is an initial effect of CO<sub>2</sub> that is later on countered by adaptation of the coral. For example, coral may adapt to a higher *p*CO<sub>2</sub> by lowering carbonic anhydrase activity (Lesser et al., 2004), leading to a lower efficiency of the carbon concentrating mechanism (CCM).

There is one earlier study that describes effects of dissolved inorganic carbon on net photosynthesis in *G. fascicularis* (Goiran et al., 1996), in which an optimal pH of 8.8 was reported for net photosynthesis. Our study contradicts with this result for reasons that remain to be investigated.

We conclude that our study represented a situation in which the influx of DIC was limiting coral photosynthesis. DIC limitation of photosynthesis may occur in shallow water where light is saturating (Osinga et al., 2011). Our results demonstrate that under such conditions, high flow and increased levels of carbon dioxide can alleviate DIC limitation and stimulate coral photosynthesis.

**Dark respiration** - Changes in  $p\text{CO}_2$  and corresponding changes in pH did not change rates of dark respiration in *G. fascicularis*. Apparently, a decrease in ocean pH to 7.84 does not quantitatively affect catabolism in this coral.

Flow and ambient oxygen saturation level both stimulated dark respiration of *G. fascicularis*, in an interactive way. The positive effect of flow on dark respiration found here is in line with earlier research (Patterson et al., 1991; Sebens et al., 2003), which showed that flow enhances dark respiration in corals within the range of flow velocities applied in our study (1-13  $\text{cm s}^{-1}$ ). The significant positive main effect of oxygen saturation on dark respiration supports the often proposed theory (e.g. Chalker and Taylor, 1975; Rinkevich and Loya, 1984; Ip et al., 1991; Colombo-Palotta et al., 2010; Wijgerde et al., 2012a) that dark calcification in corals is limited by a lack of metabolic energy due to dark respiration being oxygen limited. Both flow and ambient oxygen saturation influence the availability of oxygen inside the tissue by affecting diffusion rates. The effect of flow was significant under hypoxic and normoxic conditions, but not under hyperoxic conditions. This indicates that dark respiration is not diffusion-limited anymore under such a high availability of dissolved oxygen. An earlier study on the effect of flow on dark respiration in *G. fascicularis* under normoxic conditions showed that flow rates above 10  $\text{cm s}^{-1}$  did not further promote dark respiration (Schutter et al., 2010), indicating a similar boundary to the relief of diffusion limitation by flow.

**Productivity and Scope for Growth** – The rates of net photosynthesis measured in this study are among the highest ever reported in scleractinian corals (Table 2). In addition, light utilization was very efficient. At the highest rate of net photosynthesis measured in this study, 23 quanta were used per molecule of eluted oxygen, an efficiency only exceeded by shade-adapted cave corals (Anthony and Hoegh-Guldberg, 2003). It should be noted here that our corals were grown at an E of 200  $\mu\text{mole quanta m}^{-2} \text{s}^{-1}$  and incubated at an E of 500  $\mu\text{mole quanta m}^{-2} \text{s}^{-1}$ . Hence, one might argue that the observed rates of net photosynthesis reflect a stress response. However, the values for net photosynthesis measured in this study correspond well to values within photosynthesis : irradiance curves determined earlier for the same clone of *G. fascicularis* (Schutter et al., 2008). The shape and values of those earlier P:I curves are in good agreement with P:I curves measured in the field for several coral

species, thus indicating that the values reported here reflect normal photosynthetic responses to the light levels that were applied.

Under all treatments in this study, photosynthetic oxygen production by *G. fascicularis* was more than two times higher than its consumption of oxygen in darkness. This indicates that there was a surplus of photosynthetically derived organic carbon available for *G. fascicularis* and its zooxanthellae under all experimental circumstances. Such a positive carbon balance implies that an organism has Scope for Growth (SfG). SfG is defined as the amount of organic carbon (acquired autotrophically and/or heterotrophically) that is available to an organism after subtracting the daily respiratory demand and excretory losses (Anthony and Fabricius, 2000). Subtracting daily dark respiration from daily net photosynthesis shows SfG'. SfG' is the amount of photosynthetically derived organic carbon that is available to the coral holobiont for growth and excretion. As an example, we calculated SfG' for the experimental treatment with the highest net photosynthesis ( $0.256 \text{ mg O}_2 \text{ cm}^{-2} \text{ h}^{-1}$ ). This value was measured at 150%  $\text{O}_2$  saturation,  $4\text{--}13 \text{ cm s}^{-1}$  and a pH of 7.84. A corresponding value for dark respiration of  $0.084 \text{ mg O}_2 \text{ cm}^{-2} \text{ h}^{-1}$  was measured under these conditions. Taking into account the 12/12 hour light/dark cycle that was applied in our study, and assuming a molar ratio of 1:1 for the number of carbon molecules fixed per molecule of oxygen eluted, daily net photosynthesis could be estimated at  $1.15 \text{ mg C cm}^{-2}$  and daily dark respiration at  $0.38 \text{ mg C cm}^{-2}$ . These values yield a SfG' of  $0.77 \text{ mg C cm}^{-2}$ . For comparison, a SfG' of  $0.13 \text{ mg C cm}^{-2} \text{ d}^{-1}$  was calculated for *Porites cylindrica* and  $0.06 \text{ mg C cm}^{-2} \text{ d}^{-1}$  for *Goniastrea retiformis* (Anthony and Fabricius, 2000). Those values are an order of magnitude lower than the values found for *G. fascicularis* in the current study. Hence, we conclude that under the experimental circumstances applied, *G. fascicularis* and its zooxanthellae had a high surplus of carbon available for process such as somatic growth, reproduction and repair of tissue damage. Indeed, growth rates reported for *G. fascicularis* are very high, specific growth rates sometimes exceeding  $0.020 \text{ d}^{-1}$  for young colonies (Wijgerde et al., 2012b). These high initial growth rates were obtained at low levels of E of  $40\text{--}60 \text{ } \mu\text{mol quanta m}^{-2} \text{ s}^{-1}$ , which confirms that *G. fascicularis* is very efficient in collecting light. Similarly, Schutter et al. (Schutter et al., 2008) reported an initial SGR for *G. fascicularis* of  $0.025 \text{ d}^{-1}$  at an E of  $90 \text{ } \mu\text{mol quanta m}^{-2} \text{ s}^{-1}$ . In addition, they found that *G. fascicularis* was still capable of growing with an SGR of  $0.006 \text{ d}^{-1}$  at a level of E as low as  $39 \text{ } \mu\text{mol quanta m}^{-2} \text{ s}^{-1}$ .

**Conclusions** - The results obtained in this study show that *Galaxea fascicularis* has a high net productivity that is insensitive to the ambient level of dissolved oxygen. Photorespiration is not likely to play a quantitatively important role in this coral. The high productivity of *G. fascicularis* leads to a saturated light respiration and a positive Scope for Growth. Under saturating light, photosynthesis in *G. fascicularis* may become DIC limited as is shown by the positive, interactive effects of flow and pH on net photosynthesis.

## References

- Al-Moghrabi, S., Goiran, C., Allemand, D., Speziale, N. and Jaubert, J.** (1996). Inorganic carbon uptake for photosynthesis by symbiotic coral/dinoflagellate associations. II. Mechanisms for bicarbonate uptake. *J. Exp. Mar. Biol. Ecol.* **199**, 227–248. (doi:10.1016/0022-0981(95)00202-2)
- Anthony, K. R. N. and Hoegh-Guldberg, O.** (2003). Variation in coral photosynthesis, respiration and growth characteristics in contrasting light microhabitats: an analogue to plants in forest gaps and understoreys? *Functional Ecology* **17**, 246–259. (doi:10.1046/j.1365-2435.2003.00731.x)
- Anthony, K. R. N. and Fabricius, K. E.** (2000). Shifting roles of heterotrophy and autotrophy in coral energetics under varying turbidity. *J Exp Mar Biol Ecol* **252**, 221–253. (doi:10.1016/S0022-0981(00)00237-9)
- Chalker, B. E. and Taylor, D. L.** (1975). Light-enhanced calcification, and the role of oxidative phosphorylation in calcification of the coral *Acropora cervicornis*. *Proc. R. Soc. B* **190**, 323–331. (doi:10.1098/rspb.1975.0096)
- Colombo-Pallotta, M. F., Rodriguez-Romain, A. and Iglesias-Prieto, R.** (2010). Calcification in bleached and unbleached *Montastraea faveolata*: evaluating the role of oxygen and glycerol. *Coral Reefs* **29**, 899–907. (doi:10.1007/s00338-010-0638-x)
- Crossland, J. and Barnes, D. J.** (1977). Gas-exchange studies with the staghorn coral *Acropora acuminata* and its zooxanthellae. *Mar. Biol.* **40**, 185–194. (doi:10.1007/BF00396265)

- Dennison, W. C. and Barnes, D. J.** (1988). Effect of water motion on coral photosynthesis and calcification. *J. Exp. Mar. Biol. Ecol.* **115**, 67–77. (doi:10.1016/0022-0981(88)90190-6)
- Downton, W. J. S., Bishop, D. G., Larkum, A. W. D. and Osmond, C. B.** (1976). Oxygen Inhibition of Photosynthetic Oxygen Evolution in Marine Plants. *Aust. J. Plant Physiol.* **3**, 73-79. (doi:10.1071/PP9760073)
- Finelli, C. M., Helmuth, B. S. T., Pentcheff, N. D. and Wethey, D. S.** (2006). Water flow influences oxygen transport and photosynthetic efficiency in corals. *Coral Reefs* **25**, 47-57. (doi:10.1007/s00338-005-0055-8)
- Furla, P., Allemand, D., Shick, J. M., Ferrier-Pagès, C., Richier, S., Plantivaux, A., Merle, P-L. and Tambutté, S.** (2005). The Symbiotic Anthozoan: A Physiological Chimera between Alga and Animal. *Integr. Comp. Biol.* **45**: 595–604. (doi:10.1093/icb/45.4.595)
- Goiran, C., Al-Moghrabi, S., Allemand, D. and Jaubert, J.** (1996). Inorganic carbon uptake for photosynthesis by the symbiotic coral/dinoflagellate association I. Photosynthetic performances of symbionts and dependence on sea water bicarbonate. *J. Exp. Mar. Biol. Ecol.* **199**, 207-225. (doi:10.1016/0022-0981(95)00201-4)
- Houlbrèque, F., Tambutté, E., Allemand, D. and Ferrier-Pagès, C.** (2004). Interactions between zooplankton feeding, photosynthesis and skeletal growth in the scleractinian coral *Stylophora pistillata*. *J. Exp. Biol.* **207**, 1461-1469. (doi:10.1242/jeb.00911)
- Ip, Y. K., Lim, A. L. L. and Lim, R. W. L.** (1991). Some properties of calciumactivated adenosine triphosphatase from the hermatypic coral *Galaxea fascicularis*. *Mar. Biol.* **111**, 191-197. (doi: 10.1007/bf01319700)
- Jokiel, P.** (2011). The reef coral two compartment proton flux model: A new approach relating tissue-level physiological processes to gross corallum morphology. *J. Exp. Mar. Biol. Ecol.* **409**, 1-12. (doi.org/10.1098/rspb.2013.0031)
- Langdon, C. and Atkinson, M. J.** (2005). Effect of elevated pCO<sub>2</sub> on photosynthesis and calcification of corals and interactions with seasonal change in temperature/irradiance and nutrient enrichment. *J. Geophys. Res.* **110**, (C09S07). (doi:10.1029/2004JC002576)



- Leggat, W., Badger, M. R. and Yellowlees, D.** (1999). Evidence for an inorganic carbon-concentrating mechanism in the symbiotic dinoflagellate *Symbiodinium* sp. *Plant Physiology* **121**, 1247–1255. (doi: 10.1104/pp.121.4.1247)
- Lesser, M. P., Weis, V. M., Patterson, M. R. and Jokiel, P. L.** (1994). Effects of morphology and water motion on carbon delivery and productivity in the reef coral, *Pocillopora damicornis* (Linnaeus): Diffusion barriers, inorganic carbon limitation, and biochemical plasticity. *J. Exp. Mar. Biol. Ecol.* **178**, 153-179. (doi:10.1016/0022-0981(94)90034-5)
- Marubini, F., Ferrier-Pagès, C., Furla, P. and Allemand, D.** (2008). Coral calcification responds to seawater acidification: a working hypothesis towards a physiological mechanism. *Coral Reefs* **27**, 491-499. (doi:10.1007/s00338-008-0375-6)
- Mass, T., Einbinder, S., Brokovich, E., Shashar, N., Vago, R., Erez, J. and Dubinsky Z.** (2007). Photoacclimation of *Stylophora pistillata* to light extremes: metabolism and calcification. *Mar. Ecol. Prog. Ser.* **334**, 93-102. (doi:10.3354/meps334093)
- Mass, T., Genin, A., Shavit, U., Grinstein, M. and Tchernov, D.** (2010). Flow enhances photosynthesis in marine benthic autotrophs by increasing the efflux of oxygen from the organism to the water. *Proc. Nat. Acad. Sci.* **107**, 2527-2531 (2010). (doi:10.1073/pnas.0912348107)
- Muscatine, L.** (1980). Productivity of zooxanthellae. In: Falkowski PG (ed) Primary productivity in the Sea. Plenum Publishing Corporation, New York, pp. 381-402.
- Nakamura, T., Van Woesik, R. and Yamasaki, H.** (2005). Photoinhibition of photosynthesis is reduced by water flow in the reef-building coral *Acropora digitifera*. *Mar. Ecol. Prog. Ser.* **301**, 109–118. (doi:10.3354/meps301109)
- Ohde, S. and Van Woesik, R.** (1999). Carbon dioxide flux and metabolic processes of a coral reef, Okinawa. *Bull. Mar. Sci.* **65**, 559-576.
- Osinga, R., Schutter, M., Griffioen, B., Wijffels, R. H., Verreth, J. A. J., Shafir, S., Henard, S., Taruffi, M., Lavorano, S. and Gili, C.** (2011). The biology and economics of coral growth. *Mar. Biotechnol.* **13**, 658-671. (doi:10.1007/s10126-011-9382-7)
- Osinga, R., Iglesias-Prieto, R. and Enríquez, S.** (2012). Measuring Photosynthesis in Symbiotic Invertebrates: A Review of Methodologies, Rates and Processes. In: Najafpour, M. (Ed.). Applied Photosynthesis. Intech, open access publishers, pp. 229-256. (doi:10.5772/29339)

- Patterson, M. R., Sebens, K. P. and Olson, R. R.** (1991). In situ measurements of flow effects on primary production and dark respiration in reef corals. *Limnol. Oceanogr.* **36**, 936–948. (doi: 10.4319/lo.1991.36.5.0936)
- Peterhansel, C., Horst, I., Niessen, M., Blume, C., Kebeish, R., Kürkcüoğlu, S. and Kreuzaler, F.** (2010). "Photorespiration." The Arabidopsis Book, The American Society of Plant Biologists. (doi:10.1199/tab.0123)
- Reynaud, S., Leclercq, N., Romaine-Lioud, S., Ferrier-Pagés, C., Jaubert, J. and Gattuso, J-P.** (2003). Interacting effects of CO<sub>2</sub> partial pressure and temperature on photosynthesis and calcification in a scleractinian coral. *Global Change Biol.* **9**, 1660–1668. (doi:10.1046/j.1365-2486.2003.00678.x)
- Richier, S., Merle, P-L., Furla, P., Pigozzi, D., Sola, F. and Allemand, D.** (2003). Characterization of superoxide dismutases in anoxia- and hyperoxia-tolerant symbiotic cnidarians." *Biochim. Biophys. Acta General Subjects* **1621**, 84-91. (doi:10.1016/S0304-4165(03)00049-7)
- Riebesell U., Fabry, V. J., Hansson L. and Gattuso J.-P. (Eds.)** (2010). "Guide to best practices for ocean acidification research and data reporting." Luxembourg, Publications Office of the European Union: 260 p.
- Rinkevich, B. and Loya, Y.** (1984). Does light enhance calcification in hermatypic corals? *Mar. Biol.* **80**, 1-6. (doi:10.1007/bf00393120)
- Rowan, R., Whitney, S. M., Fowler, A. and Yellowlees, D.** (1996). Rubisco in marine symbiotic dinoflagellates: form II enzymes in eukaryotic encoded in a multigene family. *The Plant Cell* **8**, 539–553. (doi: 10.2307/3870331)
- Schneider, K. and Erez, J.** (2006). The effect of carbonate chemistry on calcification and photosynthesis in the hermatypic coral *Acropora eurystoma*. *Limnol. Oceanogr.* **51**, 1284-1293. (doi: 10.4319/lo.2006.51.3.1284)
- Schutter, M., Van Velthoven, B., Janse, M., Osinga, R., Janssen, M., Wijffels, R. H. and Verreth, J. A. J.** (2008). The effect of irradiance on long-term skeletal growth and net photosynthesis in *Galaxea fascicularis* under four light conditions. *J. Exp. Mar. Biol. Ecol.* **367**, 75-80. (doi: 10.1016/j.jembe.2008.08.014)
- Schutter, M., Crocker, J., Paijmans, A., Janse, M., Osinga, R., Verreth, J. A. J. and Wijffels, R. H.** (2010). The effect of different flow regimes on the growth and metabolic rates of

- the scleractinian coral *Galaxea fascicularis*. *Coral Reefs* **29**, 737-748.  
(doi:10.1007/s00338-010-0617-2)
- Schutter, M., Kranenborg, S., Wijffels, R. H., Verreth, J. A. J. and Osinga, R.** (2011). Modification of light utilization for skeletal growth by water flow in the scleractinian coral *Galaxea fascicularis*. *Mar. Biol.* **158**, 769-777. (doi:10.1007/s00227-010-1605-3)
- Schutter, M., Van der Ven, R., Janse, M., Verreth, J. A. J., Wijffels, R. H. and Osinga, R.** (2012). Light intensity, light period and coral growth in an aquarium setting: A matter of photons? *J. Mar. Biol. Assoc. UK* **92**, 703-712. (doi:10.1017/S0025315411000920)
- Sebens, K. P., Helmuth, B., Carrington, E. and Agius, B.** (2003). Effects of water flow on growth and energetics of the scleractinian coral *Agaricia tenuifolia* in Belize. *Coral Reefs* **22**, 35-47. (doi: 10.1007/s00338-003-0277-6)
- Smith, D. J., Suggett, D. J. and Baker N. R.** (2005). Is photoinhibition of zooxanthellae photosynthesis the primary cause of thermal bleaching in corals? *Global Change Biol.* **11**, 1-11. (doi: 10.1111/j.1529-8817.2003.00895.x)
- Tansik, A.L., Fitt, W.K. and Hopkinson, B.M.** (2015). External carbonic anhydrase in three Caribbean corals: quantification of activity and role in CO<sub>2</sub> uptake. *Coral Reefs* **34**: 703-713.
- Vogel, S.** (1994). *Life in moving fluids: The physical biology of flow* (Second Edition). Princeton University Press, Princeton, 467 pp.
- Weis, V.** (2008). Cellular mechanisms of Cnidarian bleaching: stress causes the collapse of symbiosis. *J. Exp. Biol.* **221**, 3059-3066. (doi:10.1242/jeb.009597)
- Wijgerde, T., Jurriaans, S., Hoofd, M., Verreth, J. A. J. and Osinga, R.** (2012a). Oxygen and Heterotrophy Affect Calcification of the Scleractinian Coral *Galaxea fascicularis*. *PLoS ONE* **7**(12), e52702. doi:10.1371/journal.pone.0052702.
- Wijgerde, T., Henkemans, P. and Osinga R.** (2012b). Effects of irradiance and light spectrum on growth of the scleractinian coral *Galaxea fascicularis* — Applicability of LEP and LED lighting to coral aquaculture. *Aquaculture* **344-349**, 188-193.  
(doi:10.1016/j.aquaculture.2012.03.025)
- Wijgerde, T., Silva, C. I. F., Scherders, V., Van Bleijswijk, J. and Osinga R.** (2014). Coral calcification under daily oxygen saturation and pH dynamics reveals the dominant role of oxygen. *Biology Open*, **3**(6), 489-493. (doi:10.1242/bio.20147922)

### **Acknowledgements**

We thank the personnel of De Haar Vissen for logistic support and Marleen ten Napel for executing preliminary studies preceding this work. This study was funded by the EU Seventh Framework Programme (FP7/2007–2013) under grant agreement no. 244161 (FORCE).

### **Competing interests**

We have no competing interests.

### **Author Contributions Statement**

RO, MDH and TW designed the study, MDH and TW executed the experimental work and analysed the data; RO wrote the manuscript; MDH, TW and JV commented and improved the manuscript.

## Tables

Table 1. Results of a three-way factorial ANOVA for repeated measures on the data for dark respiration and net photosynthesis under the twelve experimental treatments.

| factor             | Dark respiration |    |       |                | Net photosynthesis |    |       |                |
|--------------------|------------------|----|-------|----------------|--------------------|----|-------|----------------|
|                    | F                | df | Error | <i>p</i> value | F                  | df | Error | <i>p</i> value |
| oxygen             | 24.968           | 2  | 10    | 0.000*         | 1.210              | 2  | 10    | 0.338          |
| flow               | 31.043           | 1  | 5     | 0.003*         | 22.184             | 1  | 5     | 0.005*         |
| pH                 | 0.828            | 1  | 5     | 0.404          | 7.474              | 1  | 5     | 0.041*         |
| oxygen * flow      | 5.554            | 2  | 10    | 0.024*         | 0.409              | 2  | 10    | 0.675          |
| oxygen * pH        | 1.378            | 2  | 10    | 0.296          | 1.324              | 2  | 10    | 0.309          |
| pH * flow          | 1.525            | 1  | 5     | 0.272          | 14.525             | 1  | 5     | 0.012*         |
| oxygen * flow * pH | 0.214            | 2  | 10    | 0.811          | 3.912              | 2  | 10    | 0.056          |

Table 2. Net photosynthesis ( $P_n$ ) and corresponding levels of quantum irradiance ( $E$ ) reported in the literature compared to the results described in this study. Values of  $P_n$  were expressed in  $\text{nmol O}_2 \text{ cm}^{-2} \text{ s}^{-1}$  to enable direct comparison to the available amount of light quanta ( $E/P_n$  gives the number of quanta available per molecule oxygen that is eluted).

| Species                       | $P_n$ ( $\text{nmol O}_2 \text{ cm}^{-2} \text{ min}^{-1}$ ) | $E$ ( $\text{nmol quanta cm}^{-2} \text{ min}^{-1}$ ) | Reference                        |
|-------------------------------|--------------------------------------------------------------|-------------------------------------------------------|----------------------------------|
| <i>Galaxea fascicularis</i>   | 130                                                          | 3000                                                  | this study                       |
| <i>Galaxea fascicularis</i>   | 80                                                           | 3000                                                  | Schutter et al., 2008            |
| <i>Galaxea fascicularis</i>   | 60                                                           | 1560                                                  | Schutter et al., 2008            |
| <i>Galaxea fascicularis</i>   | 20                                                           | 480                                                   | Schutter et al., 2008            |
| <i>Galaxea fascicularis</i>   | 10                                                           | 540                                                   | Schutter et al., 2010            |
| <i>Galaxea fascicularis</i>   | 44.5                                                         | 3360                                                  | Schutter et al., 2011            |
| <i>Montastrea annularis</i>   | 21                                                           | 3000                                                  | Patterson et al., 1991           |
| <i>Stylophora pistillata</i>  | 3.3                                                          | 2100                                                  | Houlbrèque et al., 2004          |
| <i>Acropora eurystoma</i>     | 8.3                                                          | 2100                                                  | Schneider and Erez, 2006         |
| <i>Montipora monasteriata</i> | 33                                                           | 600                                                   | Anthony and Hoegh-Guldberg, 2003 |
| <i>Montipora monasteriata</i> | 33                                                           | 900                                                   | Anthony and Hoegh-Guldberg, 2003 |
| <i>Montipora monasteriata</i> | 33                                                           | 1200                                                  | Anthony and Hoegh-Guldberg, 2003 |
| <i>Stylophora pistillata</i>  | 20                                                           | variable-high                                         | Mass et al., 2007                |
| coral assemblage              | 62                                                           | variable-high                                         | Langdon and Atkinson, 2005       |

## Figures

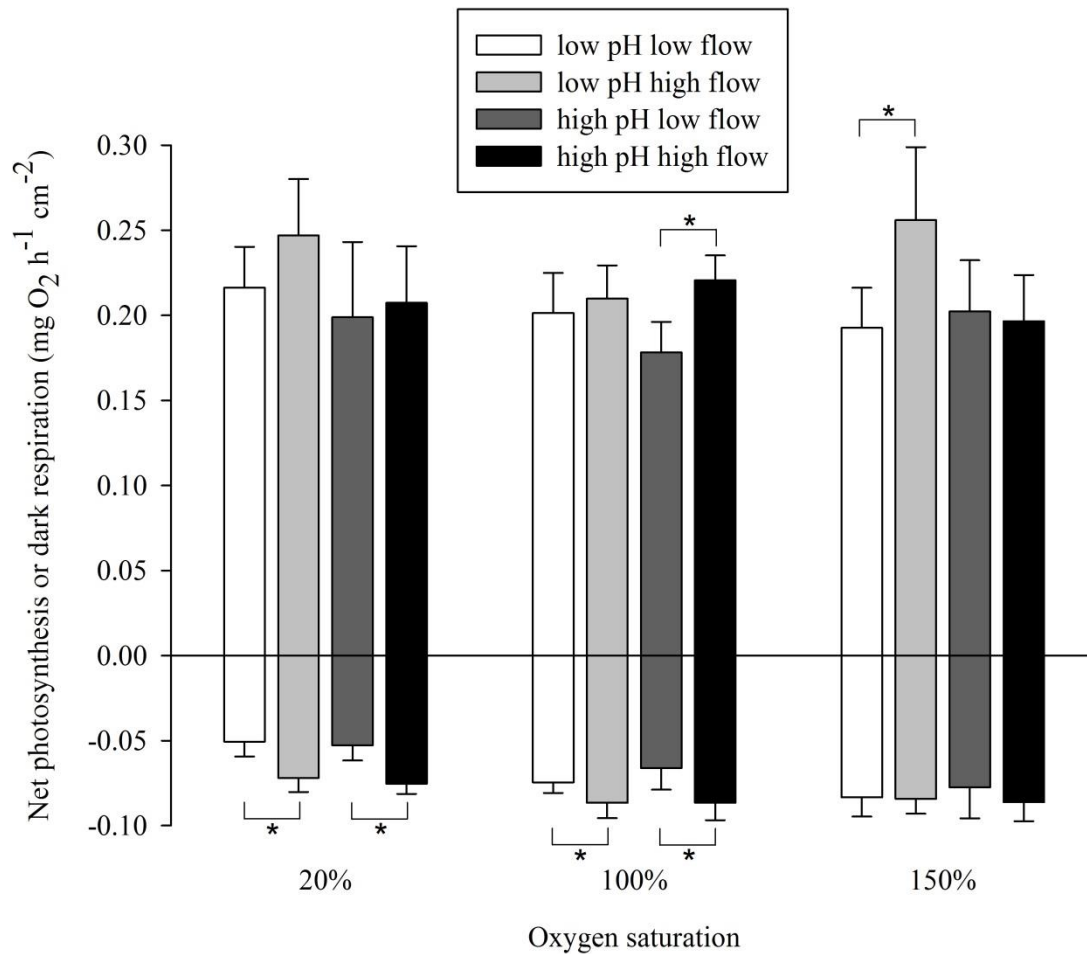

Fig. 1. Rates of net photosynthesis (positive values) and dark respiration (negative values) of *G. fascicularis* under twelve different incubation regimes with varying levels of dissolved oxygen, pH and water flow. The experiment was performed once with six replicate coral colonies, each colony being subjected to all experimental treatments ( $n=6$ ; repeated measures). Bars and error bars represent mean + s.d. In the text, we expressed the negative values for dark respiration as absolute values. \* Indicates simple contrasts with a  $p$ -value smaller than 0.05.

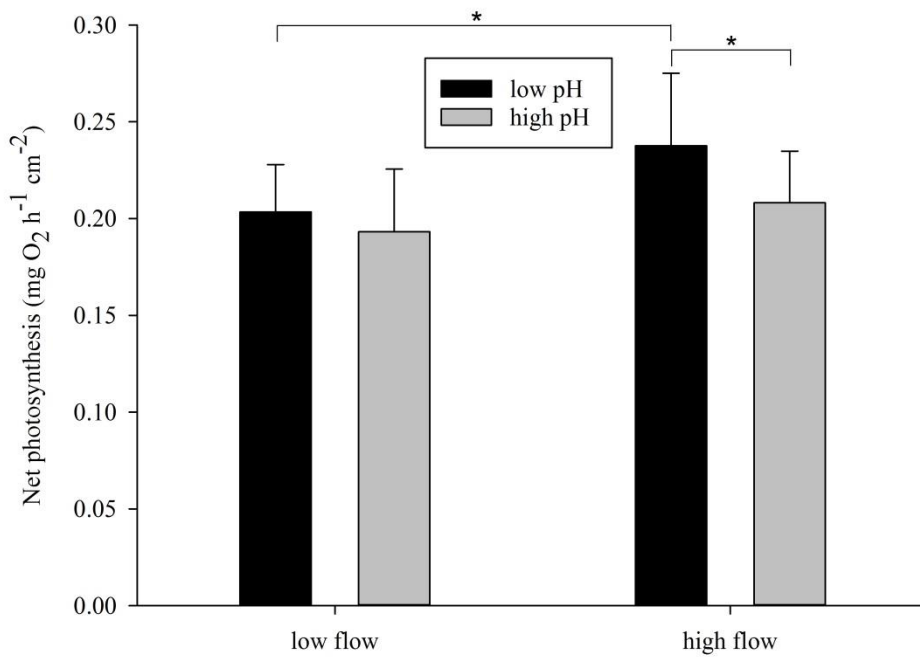

Fig. 2. **Interactive effect of flow and pH on the rates of net photosynthesis of *G. fascicularis*.** The experimental data are the same as presented in Fig. 1, data for different oxygen levels were pooled to visualize the significant interaction (2-way ANOVA for repeated measures,  $p = 0.012$ ) between flow and pH. Bars and error bars represent mean + s.d. \* Indicates simple contrasts with a  $p$ -value smaller than 0.05.



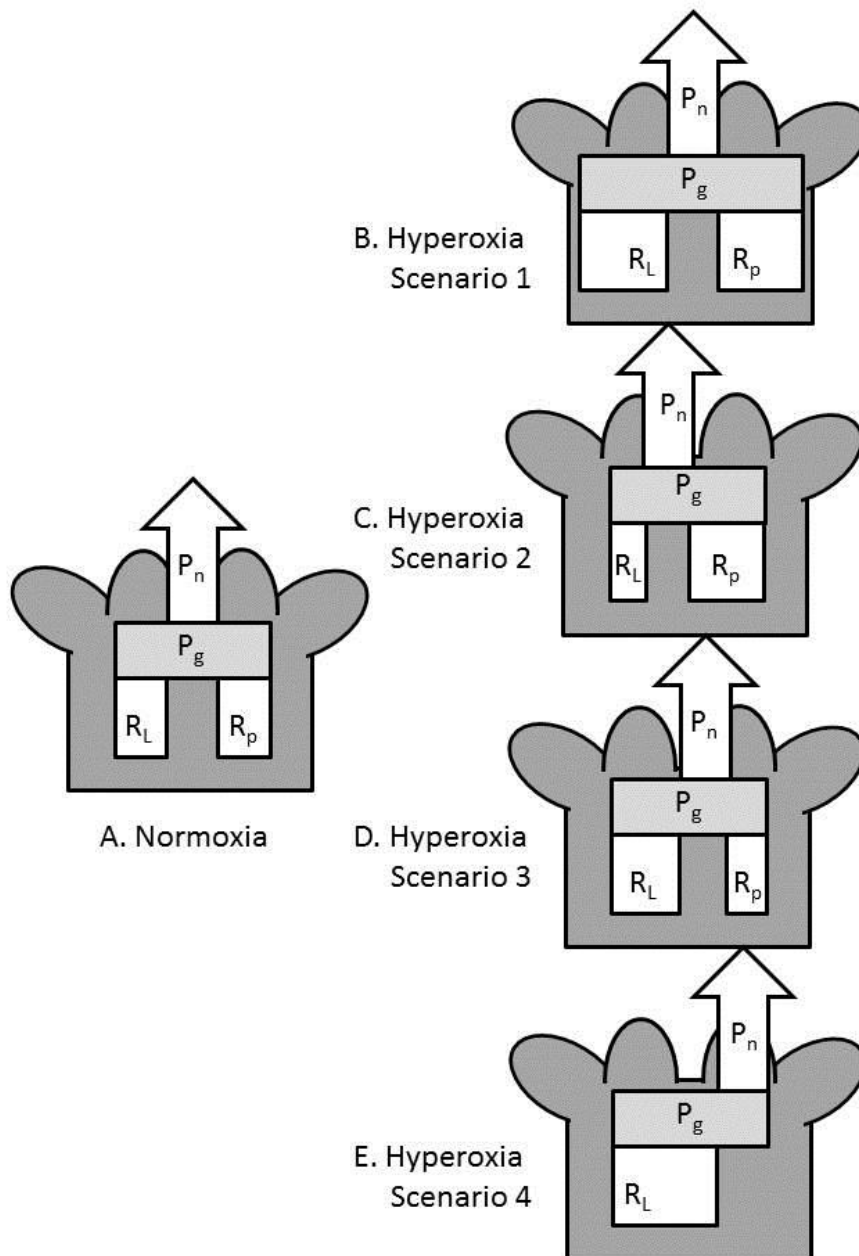

Fig. 3. Hypothetical scenarios to explain the observed lack of effect of an increased ambient oxygen concentration on net photosynthesis in *G. fascicularis*. Gross photosynthesis ( $P_g$ ) is represented by a grey box, net photosynthesis ( $P_n$ ) is represented by a

white box arrow, whereas light respiration ( $R_L$ ) photorespiration ( $R_p$ ) are represented by white boxes. The width of the boxes represents the rate of the corresponding processes inside the coral polyp. Since there was no effect of ambient oxygen on  $P_n$ , the width of the corresponding bar arrow is the same in all scenarios. **A.** Reference scenario under normoxia (100% oxygen saturation), assuming an equal contribution of  $R_L$  and  $R_p$  to oxygen consumption inside the coral. **B.** Hyperoxia Scenario 1. This scenario represents an increase in  $P_g$  compared to the reference scenario with proportional increases in  $R_L$  and  $R_p$ , thus leaving  $P_n$  unchanged. **C.** Hyperoxia Scenario 2, showing a shift in the levels of  $R_L$  and  $R_p$  without a concurrent change in either  $P_g$  or  $P_n$ . **D.** Hyperoxia Scenario 3, showing a reversed shift in the levels of  $R_L$  and  $R_p$  without a concurrent change in either  $P_g$  or  $P_n$ . **E.** Hyperoxia Scenario 4,  $P_g$  and  $P_n$  remain unchanged and  $R_p$  is absent. Scenario 1 is not likely, as it can be argued that  $P_g$  will not increase under elevated ambient oxygen levels. An exactly proportional increase/decrease in  $R_L$  and  $R_p$  or vice versa (Scenarios 2 and 3) is also unlikely, leaving Scenario 4 (absence of photorespiration) as the most likely situation in *G. fascicularis*.
